# Supplementary material for: Cryptic diversity in the Japanese mantis shrimp Oratosquilla oratoria (Crustacea: Squillidae): Allopatric diversification, secondary contact and hybridization
Source: PubMed Central journal article supplement (PMC5434036; doi:10.1038/s41598-017-02059-7), 2017-05-16
Supplement: 41598_2017_2059_MOESM1_ESM.pdf [file 41598_2017_2059_MOESM1_ESM.pdf]

Cryptic diversity in the Japanese mantis shrimp *Oratosquilla oratoria*  
(Crustacea: Squillidae): Allopatric diversification, secondary contact and  
hybridization

Jiao Cheng & Zhong-li Sha \*

Institute of Oceanology, Chinese Academy of Sciences, Qingdao 266071, China

---

\*Corresponding author: E-mail: shazl@qdio.ac.cn

**Table S1** Sampling, mtDNA COI haplotype and nrDNA ITS ribotype information for putative hybrid individuals.

| Sample locality | Abb. | Specimen ID | mtDNA COI           |                   | nrDNA ITS         |                                  |
|-----------------|------|-------------|---------------------|-------------------|-------------------|----------------------------------|
|                 |      |             | mtDNA COI haplotype | mtDNA COI lineage | nrDNA ITS lineage | No. of clones (no. of ribotypes) |
| Ariake Sea      | AS   | AS4         | Hap133              | S                 | N&S               | 4 (3)                            |
|                 |      | AS10        | Hap117              | S                 | N&S               | 4 (4)                            |
| Setonaikai      | SE   | SE4         | Hap2                | S                 | N&S               | 2 (2)                            |
|                 |      | SE5         | Hap145              | S                 | N&S               | 3 (3)                            |
|                 |      | SE16        | Hap138              | N                 | N&S               | 3 (3)                            |
| Aichi           | AI   | AI1         | Hap1                | S                 | N&S               | 3 (3)                            |
|                 |      | AI20        | Hap11               | N                 | N&S               | 3 (3)                            |
| Ishikawa        | IS   | IS1         | Hap201              | S                 | N&S               | 2 (2)                            |
|                 |      | IS2         | Hap23               | S                 | N&S               | 3 (3)                            |
|                 |      | IS7         | Hap208              | S                 | N&S               | 3 (3)                            |
|                 |      | IS9         | Hap209              | S                 | N&S               | 4 (4)                            |
|                 |      | IS11        | Hap202              | S                 | N&S               | 3 (2)                            |
|                 |      | IS14        | Hap108              | S                 | N&S               | 3 (3)                            |
|                 |      | IS15        | Hap205              | N                 | N&S               | 2 (2)                            |
|                 |      | IS17        | Hap135              | S                 | N&S               | 3 (2)                            |
|                 |      | IS18        | Hap2                | S                 | N&S               | 6 (5)                            |
|                 |      | IS19        | Hap184              | N                 | N&S               | 7 (6)                            |
| Aomori          | AO   | AO1         | Hap2                | S                 | N                 | 10 (10)                          |
|                 |      | AO4         | Hap14               | S                 | N                 | 10 (4)                           |
|                 |      | AO19        | Hap195              | S                 | N                 | 8 (5)                            |

**Table S2** Pairwise  $F_{ST}$  comparisons between different sampling locations under the same or different lineages inferred from mtDNA COI (below diagonal) and nrDNA ITS (above diagonal).

| Locality | Lineage N          |                    |                |                    |                |                    |                |                    |                    |                |                    |               | Lineage S          |                |                    |                |                    |                |                    |                    |                    |                |      |      |    |    |
|----------|--------------------|--------------------|----------------|--------------------|----------------|--------------------|----------------|--------------------|--------------------|----------------|--------------------|---------------|--------------------|----------------|--------------------|----------------|--------------------|----------------|--------------------|--------------------|--------------------|----------------|------|------|----|----|
|          | QHD                | LYG                | SY-N           | DL                 | DY             | QD                 | DF-N           | OT                 | AO-N               | IS-N           | AI-N               | SE-N          | AS-N               | DF-S           | SS                 | NJ             | XM                 | BH             | IS-S               | AI-S               | SE-S               | AS-S           | AO-S | SY-S | MI | HN |
| QHD      | —                  |                    |                |                    |                |                    |                |                    |                    |                |                    |               |                    |                |                    |                |                    |                |                    |                    |                    |                |      |      |    |    |
| LYG      | -0.001             | —                  |                |                    |                |                    |                |                    |                    |                |                    |               |                    |                |                    |                |                    |                |                    |                    |                    |                |      |      |    |    |
| SY-N     | 0.003              | -0.008             | —              |                    |                |                    |                |                    |                    |                |                    |               |                    |                |                    |                |                    |                |                    |                    |                    |                |      |      |    |    |
| DL       | 0.004              | 0.004              | -0.006         | —                  | -0.020         | -0.014             | 0.009          | 0.041              | -0.017             | -0.006         | 0.014              | 0.139         | 0.084              | <b>0.756**</b> | <b>0.720**</b>     | <b>0.759**</b> | <b>0.771**</b>     | <b>0.742**</b> | <b>0.750**</b>     | <b>0.787**</b>     | <b>0.781**</b>     | <b>0.780**</b> |      |      |    |    |
| DY       | -0.001             | 0.008              | -0.012         | 0.009              | —              | -0.002             | 0.017          | 0.047 <sup>†</sup> | -0.004             | 0.017          | 0.046 <sup>†</sup> | 0.106         | 0.041              | <b>0.778**</b> | <b>0.741**</b>     | <b>0.778**</b> | <b>0.787**</b>     | <b>0.774**</b> | <b>0.772**</b>     | <b>0.800**</b>     | <b>0.793**</b>     | <b>0.795**</b> |      |      |    |    |
| QD       | -0.006             | 0.002              | -0.008         | -0.009             | 0.020          | —                  | 0.003          | 0.017              | -0.010             | -0.010         | 0.025 <sup>†</sup> | 0.111         | 0.068              | <b>0.778**</b> | <b>0.737**</b>     | <b>0.778**</b> | <b>0.788**</b>     | <b>0.774**</b> | <b>0.771**</b>     | <b>0.805**</b>     | <b>0.795**</b>     | <b>0.798**</b> |      |      |    |    |
| DF-N     | -0.030             | -0.011             | -0.019         | -0.009             | -0.013         | -0.006             | —              | 0.031 <sup>†</sup> | 0.015              | 0.001          | 0.030 <sup>†</sup> | 0.109         | 0.044              | <b>0.779**</b> | <b>0.740**</b>     | <b>0.779**</b> | <b>0.789**</b>     | <b>0.775**</b> | <b>0.772**</b>     | <b>0.804**</b>     | <b>0.795**</b>     | <b>0.798**</b> |      |      |    |    |
| OT       | -0.002             | 0.017              | 0.000          | 0.019              | -0.012         | 0.025 <sup>†</sup> | -0.001         | —                  | 0.016              | 0.016          | 0.011              | 0.059         | 0.184 <sup>†</sup> | <b>0.791**</b> | <b>0.744**</b>     | <b>0.791**</b> | <b>0.800**</b>     | <b>0.791**</b> | <b>0.784**</b>     | <b>0.821**</b>     | <b>0.806**</b>     | <b>0.815**</b> |      |      |    |    |
| AO-N     | 0.040 <sup>†</sup> | 0.031 <sup>†</sup> | 0.013          | 0.016              | 0.043          | 0.010              | 0.038          | 0.032 <sup>†</sup> | —                  | 0.009          | 0.040 <sup>†</sup> | 0.088         | 0.072              | <b>0.791**</b> | <b>0.754**</b>     | <b>0.79**</b>  | <b>0.799**</b>     | <b>0.791**</b> | <b>0.785**</b>     | <b>0.811**</b>     | <b>0.803**</b>     | <b>0.807**</b> |      |      |    |    |
| IS-N     | 0.001              | 0.028              | 0.038          | 0.048 <sup>†</sup> | 0.006          | 0.057 <sup>†</sup> | -0.004         | 0.005              | 0.067 <sup>†</sup> | —              | 0.035 <sup>†</sup> | 0.080         | 0.014              | <b>0.781**</b> | <b>0.748**</b>     | <b>0.780**</b> | <b>0.789**</b>     | <b>0.779**</b> | <b>0.776**</b>     | <b>0.798**</b>     | <b>0.793**</b>     | <b>0.794**</b> |      |      |    |    |
| AI-N     | -0.034             | -0.040             | -0.063         | -0.055             | -0.063         | -0.04              | -0.071         | -0.054             | -0.009             | -0.034         | —                  | -0.060        | -0.017             | <b>0.708**</b> | <b>0.690**</b>     | <b>0.708**</b> | <b>0.718**</b>     | <b>0.688**</b> | <b>0.702**</b>     | <b>0.712**</b>     | <b>0.725**</b>     | <b>0.712**</b> |      |      |    |    |
| SE-N     | -0.014             | -0.032             | 0.022          | 0.021              | 0.020          | -0.014             | -0.059         | 0.044              | 0.023              | -0.036         | 0.043              | —             | 0.201              | <b>0.710*</b>  | <b>0.679**</b>     | <b>0.718**</b> | <b>0.732**</b>     | <b>0.671*</b>  | <b>0.706*</b>      | <b>0.738*</b>      | <b>0.745*</b>      | <b>0.734*</b>  |      |      |    |    |
| AS-N     | 0.087              | 0.101              | 0.226          | 0.226              | 0.215          | 0.129              | 0.018          | 0.254              | 0.190              | -0.076         | 0.351              | -0.335        | —                  | <b>0.730*</b>  | <b>0.702**</b>     | <b>0.737*</b>  | <b>0.751**</b>     | <b>0.694*</b>  | <b>0.725*</b>      | <b>0.758*</b>      | <b>0.764**</b>     | <b>0.752*</b>  |      |      |    |    |
| DF-S     | <b>0.904**</b>     | <b>0.909**</b>     | <b>0.915**</b> | <b>0.919**</b>     | <b>0.910**</b> | <b>0.912**</b>     | <b>0.899**</b> | <b>0.917**</b>     | <b>0.920**</b>     | <b>0.895**</b> | <b>0.910**</b>     | <b>0.901*</b> | <b>0.899</b>       | —              | 0.035              | -0.002         | 0.008              | -0.011         | 0.035              | 0.025              | -0.005             | 0.017          |      |      |    |    |
| SS       | <b>0.901**</b>     | <b>0.906**</b>     | <b>0.911**</b> | <b>0.914**</b>     | <b>0.906**</b> | <b>0.909**</b>     | <b>0.897**</b> | <b>0.913**</b>     | <b>0.915**</b>     | <b>0.894**</b> | <b>0.904**</b>     | <b>0.897*</b> | <b>0.894*</b>      | -0.021         | —                  | 0.013          | 0.016              | -0.007         | 0.050 <sup>†</sup> | 0.057 <sup>†</sup> | 0.044 <sup>†</sup> | 0.038          |      |      |    |    |
| NJ       | <b>0.910**</b>     | <b>0.913**</b>     | <b>0.918**</b> | <b>0.921**</b>     | <b>0.914**</b> | <b>0.916**</b>     | <b>0.908**</b> | <b>0.920**</b>     | <b>0.923**</b>     | <b>0.905**</b> | <b>0.916**</b>     | <b>0.911*</b> | <b>0.909*</b>      | -0.008         | 0.014              | —              | -0.027             | -0.016         | 0.044 <sup>†</sup> | 0.030              | -0.002             | 0.011          |      |      |    |    |
| XM       | <b>0.913**</b>     | <b>0.917**</b>     | <b>0.923**</b> | <b>0.926**</b>     | <b>0.918**</b> | <b>0.920**</b>     | <b>0.911**</b> | <b>0.924**</b>     | <b>0.928**</b>     | <b>0.907**</b> | <b>0.924**</b>     | <b>0.918*</b> | <b>0.917*</b>      | 0.001          | 0.024              | 0.011          | —                  | -0.007         | 0.065 <sup>†</sup> | 0.070 <sup>†</sup> | 0.015              | 0.028          |      |      |    |    |
| BH       | <b>0.910**</b>     | <b>0.915**</b>     | <b>0.921**</b> | <b>0.925**</b>     | <b>0.915**</b> | <b>0.918**</b>     | <b>0.906**</b> | <b>0.922**</b>     | <b>0.926**</b>     | <b>0.902**</b> | <b>0.920**</b>     | <b>0.913*</b> | <b>0.911</b>       | -0.020         | 0.003              | -0.021         | -0.011             | —              | -0.011             | -0.003             | -0.022             | -0.032         |      |      |    |    |
| IS-S     | <b>0.915**</b>     | <b>0.920**</b>     | <b>0.927**</b> | <b>0.931**</b>     | <b>0.921**</b> | <b>0.923**</b>     | <b>0.913</b>   | <b>0.929**</b>     | <b>0.933**</b>     | <b>0.908**</b> | <b>0.935**</b>     | <b>0.929*</b> | <b>0.930</b>       | -0.017         | 0.005              | -0.027         | -0.001             | -0.039         | —                  | 0.020              | 0.002              | -0.033         |      |      |    |    |
| AI-S     | <b>0.905**</b>     | <b>0.911**</b>     | <b>0.918**</b> | <b>0.922**</b>     | <b>0.912**</b> | <b>0.914**</b>     | <b>0.900**</b> | <b>0.920**</b>     | <b>0.923**</b>     | <b>0.895**</b> | <b>0.914**</b>     | <b>0.902*</b> | <b>0.899</b>       | -0.006         | -0.002             | -0.011         | 0.032              | -0.017         | -0.013             | —                  | 0.016              | 0.006          |      |      |    |    |
| SE-S     | <b>0.914**</b>     | <b>0.917**</b>     | <b>0.922**</b> | <b>0.925**</b>     | <b>0.918**</b> | <b>0.920**</b>     | <b>0.912**</b> | <b>0.923**</b>     | <b>0.927**</b>     | <b>0.909**</b> | <b>0.921**</b>     | <b>0.917*</b> | <b>0.915*</b>      | 0.004          | 0.006              | 0.022          | 0.068 <sup>†</sup> | 0.034          | 0.017              | 0.008              | —                  | -0.027         |      |      |    |    |
| AS-S     | <b>0.909**</b>     | <b>0.913**</b>     | <b>0.918**</b> | <b>0.921**</b>     | <b>0.913**</b> | <b>0.915**</b>     | <b>0.906**</b> | <b>0.919**</b>     | <b>0.922**</b>     | <b>0.903**</b> | <b>0.915**</b>     | <b>0.909*</b> | <b>0.907</b>       | 0.008          | 0.030 <sup>†</sup> | 0.001          | 0.021              | -0.010         | -0.019             | -0.015             | 0.029 <sup>†</sup> | —              |      |      |    |    |

|      |                |                |                |                |                |                |                |                |                |                |                |               |              |        |        |        |        |        |        |        |       |        |        |        |        |   |
|------|----------------|----------------|----------------|----------------|----------------|----------------|----------------|----------------|----------------|----------------|----------------|---------------|--------------|--------|--------|--------|--------|--------|--------|--------|-------|--------|--------|--------|--------|---|
| AO-S | <b>0.907**</b> | <b>0.915**</b> | <b>0.924**</b> | <b>0.929**</b> | <b>0.916**</b> | <b>0.919**</b> | <b>0.899*</b>  | <b>0.926**</b> | <b>0.931**</b> | <b>0.890*</b>  | <b>0.935*</b>  | <b>0.914</b>  | <b>0.918</b> | -0.063 | -0.041 | -0.032 | -0.068 | -0.082 | -0.011 | -0.049 | 0.038 | -0.051 | —      |        |        |   |
| SY-S | <b>0.906</b>   | <b>0.915</b>   | <b>0.924</b>   | <b>0.930</b>   | <b>0.916</b>   | <b>0.919</b>   | <b>0.894</b>   | <b>0.927</b>   | <b>0.933</b>   | <b>0.883</b>   | <b>0.942</b>   | <b>0.904</b>  | <b>1.000</b> | -0.240 | -0.289 | -0.082 | -0.268 | -0.150 | 0.064  | -0.130 | 0.048 | -0.051 | -0.425 | —      |        |   |
| MI   | <b>0.917**</b> | <b>0.920**</b> | <b>0.925**</b> | <b>0.928**</b> | <b>0.921**</b> | <b>0.922**</b> | <b>0.916**</b> | <b>0.927**</b> | <b>0.930**</b> | <b>0.912**</b> | <b>0.928**</b> | <b>0.923*</b> | <b>0.922</b> | -0.017 | -0.009 | -0.008 | 0.008  | -0.015 | -0.002 | -0.020 | 0.023 | 0.002  | -0.053 | -0.113 | —      |   |
| HN   | <b>0.914**</b> | <b>0.917**</b> | <b>0.922**</b> | <b>0.925**</b> | <b>0.918**</b> | <b>0.919**</b> | <b>0.912**</b> | <b>0.923**</b> | <b>0.926**</b> | <b>0.909**</b> | <b>0.922**</b> | <b>0.918*</b> | <b>0.916</b> | -0.015 | -0.014 | -0.001 | 0.015  | -0.015 | -0.004 | -0.017 | 0.030 | 0.015  | -0.032 | -0.192 | -0.018 | — |

\*  $P < 0.05$ ; \*\*  $P < 0.001$
